# Supplementary material
Source: PubMed Central journal article supplement (PMC3341555)
Supplement: mmc1.pdf [file mmc1.pdf]

# Accumulated Bending Energy Elicits Neutral Sphingomyelinase Activity in Human Red Blood Cells

David J. López,<sup>†</sup> Meritxell Egido-Gabas,<sup>‡</sup> Iván López-Montero,<sup>§</sup> Jon V. Busto,<sup>†</sup> Josefina Casas,<sup>‡</sup> Marie Garnier,<sup>¶</sup> Francisco Monroy,<sup>§</sup> Banafshé Larijani,<sup>¶</sup> Félix M. Goñi,<sup>†</sup> and Alicia Alonso<sup>†</sup>

<sup>†</sup>Unidad de Biofísica (Centro Mixto CSIC-UPV/EHU) and Departamento de Bioquímica, Universidad País Vasco, Spain; <sup>‡</sup>Research Unit on Bioactive Molecules, Departamento de Química Organica Biologica, Institut d'Investigacions Químiques i Ambientals de Barcelona, Spain; <sup>§</sup>Mechanics of Biological Membranes and Biorheology, Departamento de Química Física I, Universidad Complutense de Madrid, Madrid, Spain; and <sup>¶</sup>Cell Biophysics Laboratory, London Research Institute, Cancer Research UK, London, United Kingdom

## SUPPLEMENTARY MATERIAL

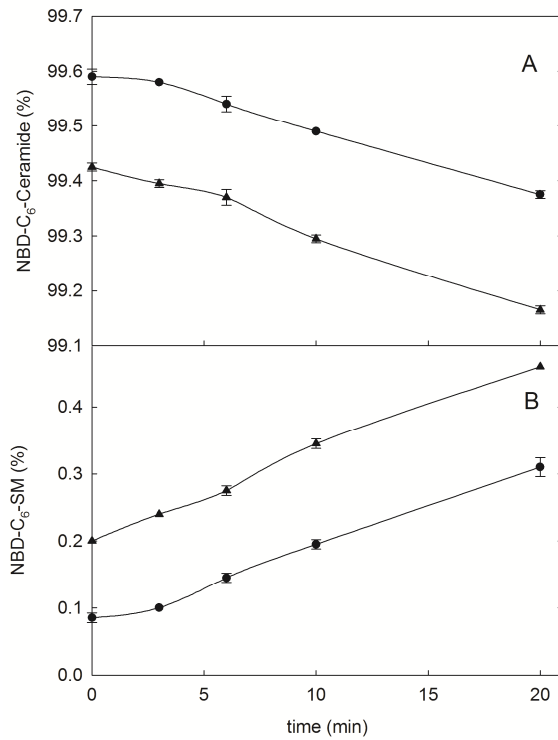

**Figure S1. Spingomyelin synthase activity in human RBC labeled with NBD-C<sub>6</sub>-Ceramide.** Cells were labeled with NBD-C<sub>6</sub>-Ceramide, incubated in hypotonic (●) or isotonic (▲) buffer and analysed after elution in a HPLC column. (A) variations of NBD-C<sub>6</sub>-Ceramide and (B) variations of NBD-C<sub>6</sub>-SM. Average values  $\pm$  SD (n = 3)

**Table S1. Characterization of sphingomyelinase activity under hypotonic and hypertonic conditions.** Average values  $\pm$  SEM (n=3-12)

| pH <sup>̄</sup> | Cations                                                              | Other additions                | hypotonic                             |            | hypertonic                            |            |
|-----------------|----------------------------------------------------------------------|--------------------------------|---------------------------------------|------------|---------------------------------------|------------|
|                 |                                                                      |                                | Initial rate, nmoles SM/min x mg prot | % activity | Initial rate, nmoles SM/min x mg prot | % activity |
| Neutral         | 1 mM Mg <sup>2+</sup> , 1 mM Ca <sup>2+</sup>                        | none                           | 31.83 $\pm$ 3.53                      | 100        | 16.8 $\pm$ 1.36                       | 100        |
| Neutral         | 1 mM Mg <sup>2+</sup>                                                | none                           | 6.28 $\pm$ 6.1                        | 20         | 7.45 $\pm$ 3.43                       | 44         |
| Neutral         | 1 mM Ca <sup>2+</sup>                                                | none                           | 3.92 $\pm$ 14.12                      | 12         | 11.27 $\pm$ 3.23                      | 67         |
| Neutral         | 1 mM Mg <sup>2+</sup> , 1 mM Ca <sup>2+</sup>                        | 20 $\mu$ M GW4869              | 7.79 $\pm$ 10.02                      | 24         | 3.52 $\pm$ 1.56                       | 21         |
| Neutral         | 1 mM Mg <sup>2+</sup> , 1 mM Ca <sup>2+</sup>                        | 10 $\mu$ M spiroepoxide        | 0                                     | 0          | 10 $\pm$ 2.94                         | 59         |
| Neutral         | 1 mM Mg <sup>2+</sup> , 1 mM Ca <sup>2+</sup>                        | 1 mg/ml trypsin                | 14.14 $\pm$ 4.71                      | 44         | <i>nd</i>                             | <i>nd</i>  |
| Neutral         | 1 mM Mg <sup>2+</sup> , 1 mM Ca <sup>2+</sup>                        | 1 mg/ml $\alpha$ -chymotrypsin | 0                                     | 0          | <i>nd</i>                             | <i>nd</i>  |
| Acidic          | 1 mM Mg <sup>2+</sup> , 1 mM Ca <sup>2+</sup>                        | none                           | 0                                     | 0          | 0                                     | 0          |
| Acidic          | 1 mM Mg <sup>2+</sup> , 1 mM Ca <sup>2+</sup> , 0.1 Zn <sup>2+</sup> | none                           | 0                                     | 0          | 0                                     | 0          |

<sup>̄</sup>Neutral conditions were assayed in a buffer containing 32 mM HEPES, 5mM glucose, pH 7.4; acidic conditions were assayed in 32 mM sodium acetate, 5mM glucose, pH 5.0. *nd* indicates not determined

**Table S2. Variations in the amount of different sphingomyelin species present in the human erythrocyte membrane. Average values  $\pm$  SD (n=4)**

| SM species         | 0 min, moles            | % species at 0 min | 6min, moles             | % decrease for each species |
|--------------------|-------------------------|--------------------|-------------------------|-----------------------------|
| 14:0               | 5.87E-10 $\pm$ 5.47E-11 | 3.1                | 5.56E-10 $\pm$ 5.60E-11 | 5.2                         |
| 16:1               | 3.98E-10 $\pm$ 2.26E-11 | 2.1                | 3.35E-10 $\pm$ 4.34E-11 | 15.6                        |
| 16:0               | 8.27E-09 $\pm$ 2.95E-10 | 43.8               | 6.83E-09 $\pm$ 7.31E-10 | 17.4                        |
| d16:0 <sup>=</sup> | 2.71E-10 $\pm$ 9.98E-12 | 1.4                | 2.19E-10 $\pm$ 1.73E-11 | 19.3                        |
| 18:1               | 4.75E-10 $\pm$ 4.17E-11 | 2.5                | 4.63E-10 $\pm$ 3.20E-11 | 2.7                         |
| 18:0               | 9.31E-10 $\pm$ 5.33E-11 | 4.9                | 8.57E-10 $\pm$ 4.97E-11 | 7.9                         |
| 20:1               | 1.59E-10 $\pm$ 1.57E-11 | 0.8                | 1.54E-10 $\pm$ 1.55E-11 | 3.0                         |
| 20:0               | 3.56E-10 $\pm$ 3.25E-11 | 1.9                | 3.30E-10 $\pm$ 2.68E-11 | 7.4                         |
| 22:1               | 3.98E-10 $\pm$ 3.13E-11 | 2.1                | 3.40E-10 $\pm$ 2.30E-11 | 14.6                        |
| 22:0               | 1.38E-09 $\pm$ 1.01E-10 | 7.3                | 1.25E-09 $\pm$ 9.88E-11 | 9.5                         |
| 24:2               | 7.01E-10 $\pm$ 3.45E-11 | 3.7                | 6.23E-10 $\pm$ 1.57E-11 | 11.1                        |
| 24:1               | 2.52E-09 $\pm$ 1.16E-10 | 13.3               | 2.21E-09 $\pm$ 6.18E-11 | 12.4                        |
| 24:0               | 1.88E-09 $\pm$ 1.23E-10 | 9.9                | 1.64E-09 $\pm$ 8.62E-11 | 12.7                        |
| d24:0              | 1.80E-10 $\pm$ 1.31E-11 | 1.0                | 1.56E-10 $\pm$ 4.03E-12 | 13.5                        |
| 26:1               | 1.88E-10 $\pm$ 1.57E-11 | 1.0                | 1.75E-10 $\pm$ 1.47E-11 | 6.8                         |
| 26:0               | 2.00E-10 $\pm$ 1.94E-11 | 1.1                | 1.88E-10 $\pm$ 1.67E-11 | 6.3                         |

<sup>=</sup>d indicates "dihydroxy base"
